# Supplementary material for: Isotope exchange and structural rearrangements in reactions between size-selected ionic water clusters, H3O+(H2O)n and NH4+(H2O)n, and D2O
Source: Royal Society of Chemistry journal article supplement (doi:10.1039/b804584d), 2008-01-01
Supplement: b804584d.pdf [file b804584d.pdf]

Supplementary material for:

**Isotope exchange and structural rearrangements in reactions  
between  $D_2O$  and the size-selected ionic water clusters,  
 $H_3O^+(H_2O)_n$  and  $NH_4^+(H_2O)_n$**

Patrik Urban Andersson<sup>a,\*</sup>, Mauritz Ryding<sup>a</sup>, Osamu Sekiguchi<sup>b</sup>, and Einar Uggerud<sup>b,\*</sup>

<sup>a</sup> *Department of Chemistry, Atmospheric Science, Göteborg University, SE-412 96 Göteborg, Sweden.*

<sup>b</sup> *Mass Spectrometry Laboratory and Centre of Theoretical and Computational Chemistry, Department of Chemistry, University of Oslo, POB 1033 Blindern, N-0315 Oslo, Norway.*

\*Corresponding authors. (e-mail: [pan@chem.gu.se](mailto:pan@chem.gu.se) , [einar.uggerud@kjemi.uio.no](mailto:einar.uggerud@kjemi.uio.no)).

**Computational (Quantum chemical calculations, RRKM)**

B3LYP/6-31G(d) geometry optimized structure of  $H_3O^+(H_2O)_5$

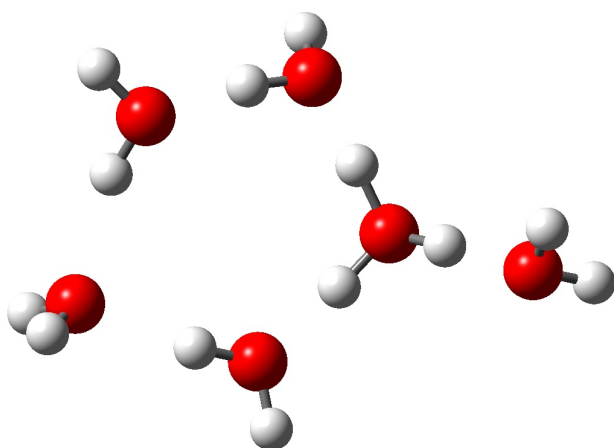

Cartesian co-ordinates (Å)

|   |          |           |           |
|---|----------|-----------|-----------|
| H | 1.005412 | 0.818841  | -0.704668 |
| H | 0.808641 | -0.879684 | -0.628551 |
| H | 2.253335 | -0.202111 | -0.116365 |

|   |           |           |           |
|---|-----------|-----------|-----------|
| O | 1.483394  | -0.128853 | -0.762177 |
| H | -0.084320 | -2.851428 | -0.262962 |
| O | -0.298242 | -1.943699 | -0.509375 |
| H | -1.179950 | -1.732224 | -0.143302 |
| H | 4.336920  | -0.591262 | 0.480061  |
| O | 3.478803  | -0.394041 | 0.879721  |
| H | 3.648864  | 0.269907  | 1.561403  |
| H | -0.556862 | 1.958667  | -0.150714 |
| O | 0.345411  | 2.052743  | -0.565139 |
| H | 0.247063  | 2.566277  | -1.377172 |
| H | -3.254670 | -1.439252 | 1.112399  |
| O | -2.870564 | -1.110446 | 0.286429  |
| H | -3.505040 | -1.346330 | -0.406368 |
| H | -2.426137 | 0.735137  | 0.435811  |
| O | -1.969985 | 1.580675  | 0.596631  |
| H | -2.643793 | 2.242423  | 0.791714  |

Sets of harmonic vibrational frequencies for  $n = 10, 15, 20$  and  $25$  were constructed based on the quantum chemically derived frequencies for  $n = 5$ . In going from  $n = 5$  to  $n = 10$ , all frequencies of the set were first taken twice. This gives 102 frequencies. Thereupon, 6 of the frequencies, identified to "belong" to one water molecules were removed, giving a final set of 96 frequencies. During this process, some manual down-adjustment of low frequencies was done to account for the larger number of soft modes with size. To avoid artificial degeneracy of modes of vibration resulting from the doubling of the data set, manual up- and down-sizing was done at this stage. For each  $n$ , the TS frequencies were constructed from the ground state set by removing one frequency at around  $60 \text{ cm}^{-1}$ , and making the following adjustments (approximate values):  $30 \text{ cm}^{-1} \rightarrow 20 \text{ cm}^{-1}$ ,  $70 \text{ cm}^{-1} \rightarrow 35 \text{ cm}^{-1}$ ,  $100 \text{ cm}^{-1} \rightarrow 70 \text{ cm}^{-1}$ ,  $200 \text{ cm}^{-1} \rightarrow 150 \text{ cm}^{-1}$ ,  $500 \text{ cm}^{-1} \rightarrow 300 \text{ cm}^{-1}$ .

The following water binding energies ( $E_{\text{ad}}$ ; critical energies of dissociation for the corresponding cluster size), in eV, were used — in agreement with binding energies reported at the NIST web page (<http://webbook.nist.gov/chemistry/>):

| $n$ | $E_{\text{ad}}$ |
|-----|-----------------|
| 5   | 0.50            |
| 10  | 0.48            |
| 15  | 0.46            |
| 20  | 0.44            |
| 25  | 0.42            |

Rate/energy relationships,  $E$  in eV, rate in  $\text{s}^{-1}$ .

| <i>n</i> | <i>m/z</i> | Ecoll<br>(eV) | Etherm<br>(eV) | Eads | Etot | Etot-Eads   | k(tot-Eads) |
|----------|------------|---------------|----------------|------|------|-------------|-------------|
| 5,00     | 109        | 0,09          | 0,35           | 0,50 | 0.94 | 0,446023256 | 2,71E+07    |
| 10,00    | 199        | 0,05          | 0,61           | 0,48 | 1.14 | 0,662794521 | 1,30E+06    |
| 15,00    | 289        | 0,04          | 0,86           | 0,46 | 1.36 | 0,901834951 | 7,24E+05    |
| 20,00    | 379        | 0,03          | 1,12           | 0,44 | 1.59 | 1,148075188 | 7,06E+05    |
| 25,00    | 469        | 0,02          | 1,37           | 0,42 | 1.82 | 1,397539877 | 9,42E+05    |

The input files to the RRKM program are given below.

Water evaporation from  $\text{H}_3\text{O}^+(\text{H}_2\text{O})_5$ ,

4180, 24180, 300, 4180, 1.D10, 0

10

0

1

51

16.7482 30.8164 60.0273

63.4176 71.6405 101.4642

110.8059 156.9787 167.4944

190.1774 200.1270 208.8569

276.5930 282.9725 288.2642

337.8825 339.9364 354.9565

389.2846 422.7807 439.1516

496.2658 530.9049 558.5186

653.4386 700.9806 754.1550

908.6487 958.2060 1066.3822

1349.2315 1627.5355 1637.7567

1647.2356 1664.1165 1685.0935

1713.3795 1790.2332 2223.8320

2903.1525 3096.2684 3273.1049

3614.0888 3682.2543 3782.0964

3801.4931 3865.7402 3880.8839

3887.5935 3893.9358 3904.2772

16.7482 20.0

35.0 63.4176 70.0

110.8059 150.0 156.9787 167.4944

190.1774 208.8569

276.5930 282.9725 288.2642 300.0

337.8825 339.9364 354.9565

389.2846 422.7807 439.1516

530.9049 558.5186

653.4386 700.9806 754.1550

908.6487 958.2060 1066.3822

1349.2315 1627.5355 1637.7567

1647.2356 1664.1165 1685.0935

1713.3795 1790.2332 2223.8320

2903.1525 3096.2684 3273.1049  
3614.0888 3682.2543 3782.0964  
3801.4931 3865.7402 3880.8839  
3887.5935 3893.9358 3904.2772

Water evaporation from  $\text{H}_3\text{O}^+(\text{H}_2\text{O})_{10}$

4010, 24010, 300, 4010, 1.D10, 0

10

0

1

96

14.7 16.7 28.8 32.8 58.0 61.0 63.4 66.4 69.6 72.6 99.5 101.5 110.8  
155.0 157.0 166.5 169.5 188.2 190.2 200.1 206.9 210.9 274.6 276.6  
281.0 284.0 286.3 290.3 335.9 337.9 339.9 341.9 355.0 357.0 386.3  
389.3 422.8 439.2 441.2 494.3 496.3 530.9 532.9 557.5 558.5 651.4  
653.4 699.0 703.0 754.2 756.2 906.6 910.6 958.2 959.2 1064.4 1067.4  
1348.2 1349.2 1625.5 1629.5 1633.8 1639.8 1647.2 1662.1 1664.1  
1683.1 1685.1 1710.4 1716.4 1788.2 1790.2 1900.0 2226.8 2900.2  
2907.2 3093.3 3097.3 3273.1 3613.1 3617.1 3681.3 3683.3 3781.1  
3782.1 3798.5 3805.5 3863.7 3868.7 3877.9 3885.6 3887.6 3890.9  
3893.9 3900.3 3905.3

14.7 16.7 18.8 32.8 34.6 58.0 63.4 66.4 71.5 72.6 99.5 110.8 150.1  
155.0 157.0 166.5 169.5 188.2 190.2 206.9 210.9 274.6 276.6 281.0  
284.0 286.3 290.3 296.3 335.9 337.9 339.9 341.9 355.0 357.0 386.3  
389.3 422.8 439.2 441.2 494.3 530.9 532.9 557.5 558.5 651.4 653.4  
699.0 703.0 754.2 756.2 906.6 910.6 958.2 959.2 1064.4 1067.4 1348.2  
1349.2 1625.5 1629.5 1633.8 1639.8 1647.2 1662.1 1664.1 1683.1  
1685.1 1710.4 1716.4 1788.2 1790.2 1900.0 2226.8 2900.2 2907.2  
3093.3 3097.3 3273.1 3613.1 3617.1 3681.3 3683.3 3781.1 3782.1  
3798.5 3805.5 3863.7 3868.7 3877.9 3885.6 3887.6 3890.9 3893.9  
3900.3 3905.3

Water evaporation from  $\text{H}_3\text{O}^+(\text{H}_2\text{O})_{15}$

3850, 23850, 300, 3850, 1.D10, 0

10

0

1

141

12.1 14.7 16.7 28.8 29.3 32.8 58.0 58.5 61.0 61.9 63.4 66.4 69.6  
72.6 99.5 100.0 101.5 110.8 155.0 155.5 157.0 166.0 166.5 169.5  
188.2 188.7 190.2 200.1 206.9 207.4 210.9 274.6 275.1 276.6 281.0  
284.0 286.3 286.8 290.3 335.9 336.4 337.9 338.4 339.9 341.9 353.5  
355.0 357.0 386.3 387.8 389.3 422.8 437.7 439.2 441.2 494.3 494.8  
496.3 530.9 532.9 557.0 557.5 558.5 651.4 651.9 653.4 699.0 699.5  
703.0 752.7 754.2 756.2 900.2 906.6 907.1 910.6 956.7 958.2 959.2  
1064.4 1064.9 1067.4 1347.7 1348.2 1349.2 1625.5 1626.0 1629.5  
1633.8 1636.3 1639.8 1645.7 1647.2 1662.1 1662.6 1664.1 1683.1  
1683.6 1685.1 1710.4 1711.9 1716.4 1788.2 1788.7 1790.2 1901.7 1910.8  
1912.0 2226.8 2907.2 3093.3 3094.8 3097.3 3271.6 3273.1 3612.6  
3613.1 3617.1 3680.8 3681.3 3683.3 3780.6 3781.1 3782.1 3798.5

3800.0 3805.5 3863.7 3864.2 3868.7 3877.9 3879.4 3885.6 3886.1  
3887.6 3890.9 3892.4 3893.9 3900.3 3902.8 3905.3  
12.1 14.7 16.7 19.3 28.8 32.8 35.6 58.0 58.5 61.9 63.4 66.4 69.6  
70.0 99.5 100.0 110.8 150.1 155.0 155.5 157.0 166.0 166.5 169.5  
188.2 188.7 190.2 206.9 207.4 210.9 274.6 275.1 276.6 281.0 284.0  
286.3 286.8 290.3 296.3 335.9 336.4 337.9 338.4 339.9 341.9 353.5  
355.0 357.0 386.3 387.8 389.3 422.8 437.7 439.2 441.2 494.3 494.8  
530.9 532.9 557.0 557.5 558.5 651.4 651.9 653.4 699.0 699.5 703.0  
752.7 754.2 756.2 900.2 906.6 907.1 910.6 956.7 958.2 959.2 1064.4  
1064.9 1067.4 1347.7 1348.2 1349.2 1625.5 1626.0 1629.5 1633.8  
1636.3 1639.8 1645.7 1647.2 1662.1 1662.6 1664.1 1683.1 1683.6  
1685.1 1710.4 1711.9 1716.4 1788.2 1788.7 1790.2 1901.7 1910.8 1912.0  
2226.8 2907.2 3093.3 3094.8 3097.3 3271.6 3273.1 3612.6 3613.1  
3617.1 3680.8 3681.3 3683.3 3780.6 3781.1 3782.1 3798.5 3800.0  
3805.5 3863.7 3864.2 3868.7 3877.9 3879.4 3885.6 3886.1 3887.6  
3890.9 3892.4 3893.9 3900.3 3902.8 3905.3

Water evaporation from  $\text{H}_3\text{O}^+(\text{H}_2\text{O})_{20}$

3680, 23680, 300, 3680, 1.D10, 0

10

0

1

186

10.7 12.1 14.7 16.7 28.2 28.8 29.3 32.8 58.0 58.5 60.0 61.0 61.9  
63.4 63.4 66.4 69.6 72.6 99.5 100.0 101.4 101.5 110.8 155.0 155.5  
156.8 157.0 166.0 166.5 167.3 169.5 188.2 188.7 190.0 190.2 200.1  
206.9 207.4 208.6 210.9 274.6 275.1 276.3 276.6 281.0 284.0 286.3  
286.8 288.0 290.3 335.9 336.4 337.5 337.9 338.4 339.6 339.9 341.9  
353.5 354.6 355.0 357.0 386.3 387.8 388.9 389.3 422.8 437.7 438.7  
439.2 441.2 494.3 494.8 495.8 496.3 530.9 532.9 557.0 557.5 558.0  
558.5 651.4 651.9 652.8 653.4 699.0 699.5 700.3 703.0 752.7 753.4  
754.2 756.2 900.2 901.7 906.6 907.1 907.7 910.6 956.7 957.2 958.2  
959.2 1064.4 1064.9 1065.3 1067.4 1347.7 1347.9 1348.2 1349.2 1625.5  
1625.9 1626.0 1629.5 1633.8 1636.1 1636.3 1639.8 1645.6 1645.7  
1647.2 1662.1 1662.5 1662.6 1664.1 1683.1 1683.4 1683.6 1685.1  
1710.4 1711.7 1711.9 1716.4 1788.2 1788.4 1788.7 1790.2 1821.6  
1821.8 1822.3 1826.8 1900.2 2207.2 3093.2 3093.3 3094.8 3097.3  
3269.8 3271.6 3273.1 3610.5 3612.6 3613.1 3617.1 3678.6 3680.8  
3681.3 3683.3 3778.3 3780.6 3781.1 3782.1 3797.7 3798.5 3800.0  
3805.5 3861.9 3863.7 3864.2 3868.7 3877.0 3877.9 3879.4 3883.7  
3885.6 3886.1 3887.6 3890.0 3890.9 3892.4 3893.9 3900.3 3900.4  
3902.8 3905.3  
10.7 12.1 14.7 16.7 19.3 28.2 28.8 32.8 35.6 58.0 58.5 60.0 61.9  
63.4 63.4 66.4 70.5 72.6 99.5 100.0 101.4 110.8 150.1 155.0 155.5  
156.8 157.0 166.0 166.5 167.3 169.5 188.2 188.7 190.0 190.2 206.9  
207.4 208.6 210.9 274.6 275.1 276.3 276.6 281.0 284.0 286.3 286.8  
288.0 290.3 295.8 335.9 336.4 337.5 337.9 338.4 339.6 339.9 341.9  
353.5 354.6 355.0 357.0 386.3 387.8 388.9 389.3 422.8 437.7 438.7  
439.2 441.2 494.3 494.8 496.3 530.9 532.9 557.0 557.5 558.0 558.5  
651.4 651.9 652.8 653.4 699.0 699.5 700.3 703.0 752.7 753.4 754.2

756.2 900.2 901.7 906.6 907.1 907.7 910.6 956.7 957.2 958.2 959.2  
1064.4 1064.9 1065.3 1067.4 1347.7 1347.9 1348.2 1349.2 1625.5  
1625.9 1626.0 1629.5 1633.8 1636.1 1636.3 1639.8 1645.6 1645.7  
1647.2 1662.1 1662.5 1662.6 1664.1 1683.1 1683.4 1683.6 1685.1  
1710.4 1711.7 1711.9 1716.4 1788.2 1788.4 1788.7 1790.2 1821.6  
1821.8 1822.3 1826.8 1900.2 2207.2 3093.2 3093.3 3094.8 3097.3  
3269.8 3271.6 3273.1 3610.5 3612.6 3613.1 3617.1 3678.6 3680.8  
3681.3 3683.3 3778.3 3780.6 3781.1 3782.1 3797.7 3798.5 3800.0  
3805.5 3861.9 3863.7 3864.2 3868.7 3877.0 3877.9 3879.4 3883.7  
3885.6 3886.1 3887.6 3890.0 3890.9 3892.4 3893.9 3900.3 3900.4  
3902.8 3905.3

Water evaporation from  $\text{H}_3\text{O}^+(\text{H}_2\text{O})_{25}$

3510, 23510, 300, 3510, 1.D10, 0

10

0

1

231

9.0 10.7 12.1 14.7 16.7 29.3 25.5 28.2 28.8 32.8 69.6 58.0 58.4 58.5  
60.0 61.0 61.8 61.9 63.4 63.4 66.4 99.8 72.6 99.5 100.0 101.4 101.5  
190.2 110.8 155.0 155.2 155.5 156.8 157.0 165.7 166.0 166.5 167.3  
169.5 188.2 188.3 188.7 190.0 200.1 206.9 206.9 207.4 208.6 210.9  
274.5 274.6 275.1 276.3 276.6 281.0 284.0 286.2 286.3 286.8 288.0  
495.8 290.3 335.7 335.9 336.4 337.5 337.8 337.9 338.4 339.6 339.9  
341.9 352.7 353.5 354.6 355.0 357.0 386.3 387.0 387.8 388.9 389.3  
422.8 436.8 437.7 438.7 439.2 441.2 493.8 494.3 494.8 496.3 530.9  
532.9 555.9 557.0 557.5 558.0 558.5 650.6 651.4 651.9 652.8 653.4  
698.1 699.0 699.5 700.3 703.0 751.1 752.7 753.4 754.2 756.2 895.8  
900.2 900.2 901.7 905.3 906.6 907.1 907.2 907.7 910.6 954.8 956.7  
957.2 958.2 959.2 1062.8 1064.4 1064.9 1065.3 1067.4 1088.6 1345.0  
1347.7 1347.9 1348.2 1349.2 1622.8 1625.5 1625.9 1626.0 1629.5  
1633.0 1633.8 1636.1 1636.3 1639.8 1642.4 1645.6 1645.7 1647.2  
1659.3 1662.1 1662.5 1662.6 1664.1 1680.2 1683.1 1683.4 1683.6  
1685.1 1708.5 1710.4 1711.7 1711.9 1716.4 1785.2 1788.2 1788.4  
1788.7 1790.2 2217.9 1821.6 1821.8 1822.3 1826.8 3093.2 3093.3  
3094.8 3097.3 3265.1 3269.8 3271.6 3273.1 3605.4 3610.5 3612.6  
3613.1 3617.1 3673.4 3678.6 3680.8 3681.3 3683.3 3773.0 3778.3  
3780.6 3781.1 3782.1 3792.4 3797.7 3798.5 3800.0 3805.5 3856.5  
3861.9 3863.7 3864.2 3868.7 3871.6 3877.0 3877.9 3878.3 3879.4  
3883.7 3884.7 3885.6 3886.1 3887.6 3890.0 3890.9 3892.4 3893.9  
3895.0 3900.3 3900.4 3902.8 3905.3  
9.0 10.7 12.1 14.7 16.7 19.3 25.5 28.2 28.8 32.8 35.6 58.0 58.4 58.5  
61.0 61.8 61.9 63.4 63.4 66.4 69.6 70.0 99.5 99.8 101.4 101.5 110.8  
150.0 155.0 155.2 155.5 156.8 157.0 165.7 166.0 166.5 167.3 169.5  
188.2 188.3 188.7 190.0 190.2 206.9 206.9 207.4 208.6 210.9 274.5  
274.6 275.1 276.3 276.6 281.0 284.0 286.2 286.3 286.8 288.0 290.3  
296.3 335.7 335.9 336.4 337.5 337.8 337.9 338.4 339.6 339.9 341.9  
352.7 353.5 354.6 355.0 357.0 386.3 387.0 387.8 388.9 389.3 422.8  
436.8 437.7 438.7 439.2 441.2 493.8 494.3 494.8 495.8 530.9 532.9  
555.9 557.0 557.5 558.0 558.5 650.6 651.4 651.9 652.8 653.4 698.1

|        |        |        |        |        |        |        |        |        |        |       |
|--------|--------|--------|--------|--------|--------|--------|--------|--------|--------|-------|
| 699.0  | 699.5  | 700.3  | 703.0  | 751.1  | 752.7  | 753.4  | 754.2  | 756.2  | 895.8  | 900.2 |
| 900.2  | 901.7  | 905.3  | 906.6  | 907.1  | 907.2  | 907.7  | 910.6  | 954.8  | 956.7  | 957.2 |
| 958.2  | 959.2  | 1062.8 | 1064.4 | 1064.9 | 1065.3 | 1067.4 | 1088.6 | 1345.0 | 1347.7 |       |
| 1347.9 | 1348.2 | 1349.2 | 1622.8 | 1625.5 | 1625.9 | 1626.0 | 1629.5 | 1633.0 |        |       |
| 1633.8 | 1636.1 | 1636.3 | 1639.8 | 1642.4 | 1645.6 | 1645.7 | 1647.2 | 1659.3 |        |       |
| 1662.1 | 1662.5 | 1662.6 | 1664.1 | 1680.2 | 1683.1 | 1683.4 | 1683.6 | 1685.1 |        |       |
| 1708.5 | 1710.4 | 1711.7 | 1711.9 | 1716.4 | 1785.2 | 1788.2 | 1788.4 | 1788.7 |        |       |
| 1790.2 | 2217.9 | 1821.6 | 1821.8 | 1822.3 | 1826.8 | 3093.2 | 3093.3 | 3094.8 |        |       |
| 3097.3 | 3265.1 | 3269.8 | 3271.6 | 3273.1 | 3605.4 | 3610.5 | 3612.6 | 3613.1 |        |       |
| 3617.1 | 3673.4 | 3678.6 | 3680.8 | 3681.3 | 3683.3 | 3773.0 | 3778.3 | 3780.6 |        |       |
| 3781.1 | 3782.1 | 3792.4 | 3797.7 | 3798.5 | 3800.0 | 3805.5 | 3856.5 | 3861.9 |        |       |
| 3863.7 | 3864.2 | 3868.7 | 3871.6 | 3877.0 | 3877.9 | 3878.3 | 3879.4 | 3883.7 |        |       |
| 3884.7 | 3885.6 | 3886.1 | 3887.6 | 3890.0 | 3890.9 | 3892.4 | 3893.9 | 3895.0 |        |       |
| 3900.3 | 3900.4 | 3902.8 | 3905.3 |        |        |        |        |        |        |       |

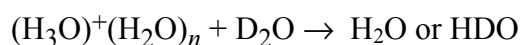

Zero point vib. energy (a.u.)

| $(\text{H}_3\text{O})^+(\text{H}_2\text{O})_n$ | $\text{D}_2\text{O}$ | $(\text{H}_3\text{O})^+(\text{H}_2\text{O})_{n-1}(\text{HDO})$         | $\text{HDO}$         | $\Delta E_{\text{zpv}}$ , kJmol <sup>-1</sup> |
|------------------------------------------------|----------------------|------------------------------------------------------------------------|----------------------|-----------------------------------------------|
| 0.175424                                       | 0.018395             | 0.172456 <sup>a</sup>                                                  | 0.021335             | -0.073514                                     |
| 0.175424                                       | 0.018395             | 0.172235 <sup>b</sup>                                                  | 0.021335             | -0.6537495                                    |
|                                                |                      | $(\text{H}_3\text{O})^+(\text{H}_2\text{O})_{n-1}(\text{D}_2\text{O})$ | $\text{H}_2\text{O}$ |                                               |
| 0.175424                                       | 0.018395             | 0.169266                                                               | 0.0242               | -0.9268015                                    |

Entropy (JK<sup>-1</sup>mol<sup>-1</sup>)

| $(\text{H}_3\text{O})^+(\text{H}_2\text{O})_n$                                         | $\text{D}_2\text{O}$ | $(\text{H}_3\text{O})^+(\text{H}_2\text{O})_{n-1}(\text{HDO})$         | $\text{HDO}$         | $\Delta S$ , kJmol <sup>-1</sup> |
|----------------------------------------------------------------------------------------|----------------------|------------------------------------------------------------------------|----------------------|----------------------------------|
| 127.689                                                                                | 47.388               | 128.749 <sup>a</sup>                                                   | 46.293               | -0.04365998                      |
| 127.689                                                                                | 47.388               | 128.452 <sup>b</sup>                                                   | 46.293               | -0.414146096                     |
| $\text{h}+(\text{h}_2\text{o})_6 + \text{D}_2\text{O} \rightarrow +\text{H}_2\text{O}$ |                      | $(\text{H}_3\text{O})^+(\text{H}_2\text{O})_{n-1}(\text{D}_2\text{O})$ | $\text{H}_2\text{O}$ |                                  |
| 127.689                                                                                | 47.388               | 129.513                                                                | 45.117               | -0.557600316                     |

a) and b) are two isotomers, in the latter the hydroxonium ion unit is deuterated
